# Supplementary material
Source: HighWire-hosted journal article supplement (https://bmjopen.bmj.com/content/8/2/e020037)
Supplement: inline-supplementary-material-1 [file inline-supplementary-material-1.pdf]

## Appendix

| Year Submitted | Region of corresponding author | Unregistered or retrospectively registered | Comments                                                      | Registry* | Funding*    |
|----------------|--------------------------------|--------------------------------------------|---------------------------------------------------------------|-----------|-------------|
| 2013           | Europe                         | Retrospective                              | Initially prospectively registered in an unapproved registry. | ISRCTN    | G           |
| 2013           | Europe                         | Retrospective                              |                                                               | CT.gov    | G           |
| 2013           | Europe                         | Retrospective                              |                                                               | CT.gov    | C (G and I) |
| 2013           | Asia                           | Retrospective                              |                                                               | CT.gov    | A           |
| 2013           | Asia                           | Retrospective                              |                                                               | CT.gov    | A           |
| 2013           | Asia                           | Retrospective                              |                                                               | CTRI      | C (A and F) |
| 2013           | Central and South America      | Unregistered                               |                                                               |           | C (A, G,I)  |
| 2014           | Europe                         | Retrospective                              |                                                               | ISRCTN    | G           |
| 2014           | Europe                         | Retrospective                              |                                                               | ISRCTN    | C (A and F) |
| 2014           | Australia/New Zealand          | Retrospective                              |                                                               | ANZCTR    | G           |
| 2014           | Europe                         | Retrospective                              |                                                               | CT.gov    | G           |
| 2014           | North America                  | Retrospective                              |                                                               | CT.gov    | C (G and F) |
| 2014           | North America                  | Retrospective                              |                                                               | CT.gov    | G           |

|      |                       |                     |                                                                                  |          |                |
|------|-----------------------|---------------------|----------------------------------------------------------------------------------|----------|----------------|
| 2014 | Europe                | Retrospective       |                                                                                  | ISRCTN   | G              |
| 2014 | Australia/New Zealand | Retrospective       |                                                                                  | ANZCTR   | G              |
| 2014 | Europe                | Retrospective       |                                                                                  | ISRCTN   | A              |
| 2014 | Europe                | Retrospective       |                                                                                  | CT.gov   | C (A and F)    |
| 2014 | Europe                | Retrospective       |                                                                                  | CT.gov   | A              |
| 2014 | Europe                | Retrospective       |                                                                                  | ISRCTN   | G              |
| 2014 | Africa/Middle East    | Retrospective       |                                                                                  | CT.gov   | C (A and F)    |
| 2014 | Europe                | Unapproved registry |                                                                                  | Eudra-CT | U              |
| 2014 | Asia                  | Retrospective       |                                                                                  | ChiCTR   | G              |
| 2014 | Europe                | Unapproved registry |                                                                                  | PACTR    | C (G and I)    |
| 2014 | Australia/New Zealand | Retrospective       | Authors appear to have changed dates in the registry after rejection by The BMJ. | ANZCTR   | G              |
| 2014 | Europe                | Retrospective       |                                                                                  | UMIN     | G              |
| 2014 | Europe                | Retrospective       |                                                                                  | ISRCTN   | C (G, F and A) |
| 2014 | Europe                | Retrospective       |                                                                                  | CT.gov   | U              |
| 2014 | Europe                | Retrospective       |                                                                                  | CT.gov   | G              |
| 2014 | North America         | Retrospective       |                                                                                  | CT.gov   | G              |
| 2014 | North America         | Retrospective       |                                                                                  | CT.gov   | G              |
| 2014 | Europe                | Retrospective       |                                                                                  | CT.gov   | C (G and I)    |
| 2014 | Australia/New Zealand | Retrospective       |                                                                                  | CT.gov   | N              |

|      |                    |               |  |          |             |
|------|--------------------|---------------|--|----------|-------------|
| 2014 | Europe             | Retrospective |  | CT.gov   | G           |
| 2014 | Asia               | Retrospective |  | ISRCTN   | G           |
| 2015 | Europe             | Retrospective |  | CT.gov   | F           |
| 2015 | Europe             | Retrospective |  | CT.gov   | G           |
| 2015 | Europe             | Retrospective |  | CT.gov   | C (F and G) |
| 2015 | Asia               | Retrospective |  | ISRCTN   | I           |
| 2014 | Europe             | Retrospective |  | NTR      | A           |
| 2015 | Africa/Middle East | Retrospective |  | CT.gov   | N           |
| 2015 | Europe             | Retrospective |  | Eudra-CT | N           |
| 2015 | Europe             | Retrospective |  | NTR      | G           |
| 2015 | Europe             | Retrospective |  | ISRCTN   | G           |
| 2015 | Europe             | Retrospective |  | CT.gov   | F           |
| 2015 | Europe             | Retrospective |  | CT.gov   | G           |
| 2015 | Europe             | Retrospective |  | CT.gov   | G           |
| 2015 | Europe             | Retrospective |  | NTR      | G           |
| 2015 | Europe             | Retrospective |  | NTR      | G           |
| 2015 | Europe             | Retrospective |  | CT.gov   | C (G and F) |

|      |                       |               |                                                                                                                                                                              |                |             |
|------|-----------------------|---------------|------------------------------------------------------------------------------------------------------------------------------------------------------------------------------|----------------|-------------|
| 2015 | Europe                | Retrospective | ISRCTN changed designation to prospective after authors supplied information regarding dates of the study                                                                    | ISRCTN         | G           |
| 2015 | Australia/New Zealand | Retrospective |                                                                                                                                                                              | ANZCTR         | G           |
| 2015 | North America         | Retrospective |                                                                                                                                                                              | CT.gov; ISRCTN | C (G and A) |
| 2015 | Europe                | Retrospective | In subsequent publication, no longer described as a clinical trial but as an “implementation-effectiveness study.” Registration information has been removed from the paper. | CT.gov         | C (G and F) |
| 2015 | Europe                | Unregistered  |                                                                                                                                                                              |                | F           |
| 2015 | Europe                | Retrospective |                                                                                                                                                                              | CT.gov         | C (G and I) |
| 2015 | Asia                  | Retrospective |                                                                                                                                                                              | ChiCTR         | A           |

|      |        |               |                                                                                                                                         |            |             |
|------|--------|---------------|-----------------------------------------------------------------------------------------------------------------------------------------|------------|-------------|
| 2015 | Europe | Retrospective | Listed on university website as published in The BMJ although it was not; this claim was subsequently removed from the website.         | German CTR | G           |
| 2015 | Europe | Unregistered  |                                                                                                                                         |            | G           |
| 2015 | Europe | Retrospective |                                                                                                                                         | ISRCTN     | G           |
| 2015 | Europe | Other         | No registration information provided; rejected in part for that reason. However, had been properly registered.                          | CT.gov     | F           |
| 2015 | Asia   | Other         | No registration information provided; rejected in part for that reason. May have been properly registered but dates cannot be verified. | CT.gov     | A           |
| 2015 | Europe | Retrospective |                                                                                                                                         | CT.gov     | C (G and F) |
| 2015 | Europe | Retrospective |                                                                                                                                         | CT.gov     | G           |

|      |                       |               |                                                                                                                             |               |             |
|------|-----------------------|---------------|-----------------------------------------------------------------------------------------------------------------------------|---------------|-------------|
| 2015 | Europe                | Retrospective |                                                                                                                             | CT.gov        | G           |
| 2015 | Europe                | Retrospective |                                                                                                                             | ISRCTN        | C (G and F) |
| 2015 | Europe                | Retrospective |                                                                                                                             | ISRCTN        | G           |
| 2015 | Europe                | Retrospective |                                                                                                                             | ISRCTN        | G           |
| 2015 | Europe                | Retrospective |                                                                                                                             | CT.gov        | C (A and G) |
| 2015 | Europe                | Unregistered  |                                                                                                                             |               | N           |
| 2015 | Europe                | Retrospective |                                                                                                                             | German<br>CTR | F           |
| 2016 | Asia                  | Retrospective |                                                                                                                             | CT.gov        | G           |
| 2016 | Europe                | Retrospective |                                                                                                                             | CT.gov        | F           |
| 2016 | North America         | Retrospective |                                                                                                                             | CT.gov        | A           |
| 2016 | Europe                | Retrospective | ISRCTN did not change designation but added additional information about dates after authors discussed the matter with them | ISRCTN        | G           |
| 2016 | Europe                | Retrospective |                                                                                                                             | PACTR         | F           |
| 2016 | Europe                | Retrospective |                                                                                                                             | ISRCTN        | C (A, F, G) |
| 2016 | Europe                | Retrospective |                                                                                                                             | CT.gov        | F           |
| 2016 | Australia/New Zealand | Retrospective |                                                                                                                             | ANZCTR        | C (G and F) |
| 2016 | Australia/New Zealand | Retrospective |                                                                                                                             | ANZCTR        | G           |

|      |                       |               |                                                                                                      |        |                  |
|------|-----------------------|---------------|------------------------------------------------------------------------------------------------------|--------|------------------|
| 2016 | Australia/New Zealand | Retrospective |                                                                                                      | ANZCTR | G                |
| 2016 | Europe                | Retrospective |                                                                                                      | ISRCTN | G                |
| 2016 | Europe                | Retrospective |                                                                                                      | CT.gov | C (G and F)      |
| 2016 | Europe                | Retrospective |                                                                                                      | ISRCTN | C (G and F)      |
| 2016 | Europe                | Retrospective |                                                                                                      | ISRCTN | G                |
| 2016 | Europe                | Retrospective |                                                                                                      | ISRCTN | G                |
| 2016 | Europe                | Retrospective |                                                                                                      | CT.gov | G                |
| 2016 | Europe                | Retrospective |                                                                                                      | CT.gov | U                |
| 2016 | Europe                | Retrospective | ISRCTN changed designation to prospective after authors supplied additional information about dates. | ISRCTN | G                |
| 2016 | North America         | Retrospective |                                                                                                      | CT.gov | G                |
| 2016 | Australia/New Zealand | Retrospective |                                                                                                      | ANZCTR | G                |
| 2016 | Europe                | Retrospective |                                                                                                      | CT.gov | C (G and F)      |
| 2016 | Europe                | Retrospective |                                                                                                      | CT.gov | ) Also insurance |
| 2016 | Europe                | Retrospective |                                                                                                      | ISRCTN | G                |
| 2016 | Europe                | Retrospective |                                                                                                      | CT.gov | C (G and F)      |
| 2016 | Europe                | Unregistered  |                                                                                                      |        | G                |
| 2016 | Asia                  | Unregistered  |                                                                                                      |        | U                |

|      |                    |                     |                                                                                                                   |          |                |
|------|--------------------|---------------------|-------------------------------------------------------------------------------------------------------------------|----------|----------------|
| 2017 | Europe             | Retrospective       |                                                                                                                   | Eudra-CT | U              |
| 2017 | Europe             | Retrospective       | ISRCTN changed categorization after authors supplied information showing initially supplied dates were incorrect. | ISRCTN   | F              |
| 2017 | Europe             | Retrospective       |                                                                                                                   | ISRCTN   | O              |
| 2017 | Europe             | Retrospective       |                                                                                                                   | ISRCTN   | G              |
| 2017 | Asia               | Retrospective       |                                                                                                                   | ChiCTR   | C (G and F)    |
| 2017 | Europe             | Retrospective       |                                                                                                                   | CT.gov   | A              |
| 2017 | Europe             | Retrospective       |                                                                                                                   | CT.gov   | A              |
| 2017 | Asia               | Unregistered        |                                                                                                                   |          | C (G, F and I) |
| 2017 | Africa/Middle East | Unregistered        |                                                                                                                   |          | U              |
| 2017 | Europe             | Retrospective       |                                                                                                                   | CT.gov   | G              |
| 2017 | Europe             | Retrospective       |                                                                                                                   | ISRCTN   | G              |
| 2017 | Europe             | Retrospective       |                                                                                                                   | NTR      | G              |
| 2017 | North America      | Unapproved registry |                                                                                                                   | AERCTR   | F              |
| 2017 | Europe             | Retrospective       |                                                                                                                   | CT.gov   | N              |
| 2017 | Europe             | Retrospective       |                                                                                                                   | CT.gov   | F              |
| 2017 | Asia               | Retrospective       |                                                                                                                   | CT.gov   | G              |



|      |               |               |  |        |             |
|------|---------------|---------------|--|--------|-------------|
| 2017 | Asia          | Retrospective |  | CT.gov | G           |
| 2017 | Europe        | Retrospective |  | NTR    | G           |
| 2017 | Europe        | Retrospective |  | CT.gov | C (G and A) |
| 2017 | Europe        | Retrospective |  | NTR    | F           |
| 2017 | Europe        | Retrospective |  | ISRCTN | G           |
| 2017 | North America | Retrospective |  | CT.gov | F           |
| 2017 | Europe        | Retrospective |  | CT.gov | G           |
| 2017 | Europe        | Retrospective |  | CT.gov | F           |
| 2017 | North America | Retrospective |  | ISRCTN | G           |
| 2017 | Asia          | Unregistered  |  |        | A           |
| 2017 | Europe        | Retrospective |  | ISRCTN | G           |

\* AECTR = American Economic Association RCT Registry; ANZCTR = Australian New Zealand Clinical Trials Registry; ChiCTR = Chinese Clinical Trial Registry; CT.gov = ClinicalTrials.gov; EudraCT = European Clinical Trials Database; German CTR = German Clinical Trials Registry; ISRCTN = International Standard Randomised Controlled Trial Number Registry; NTR = Netherlands Trial Registry; PACTR: Pan African Clinical Trials Registry

\*\*I=industry;G=government;A=Academic;F=Foundation;C=combination;U=Unknown; N=None
